# Supplementary material for: A near-infrared emitting covalent organic framework with AIE characteristics for light-emitting diodes
Source: Royal Society of Chemistry journal article supplement (doi:10.1039/d5cc00322a), 2025-01-01
Supplement: d5cc00322a1.pdf [file d5cc00322a1.pdf]

Supporting Information for

**A Near-Infrared Emitting Covalent Organic Framework with AIE  
Characteristic for Light-Emitting Diodes**

*Jingrui Liu, <sup>a</sup> Xilang Jin, <sup>\*a</sup> Xiao Li, <sup>a</sup> Xuehao Ma, <sup>a</sup> Peiyu Cui, <sup>b</sup> Tongyu Zhang, <sup>c</sup> Wenxing Chen, <sup>a</sup>  
Wenhuan Huang<sup>\*b</sup>*

<sup>a</sup> School of Materials and Chemical Engineering, Xi'an Technological University, Xi'an 710021, PR China.

<sup>b</sup> Key Laboratory of Chemical Additives for China National Light Industry, College of Chemistry and Chemical Engineering, Shaanxi University of Science and Technology, Xi'an 710021, China.

<sup>c</sup> College of Materials Science and Engineering, Sichuan University, Chengdu 610064, China.

**Contents**

|                                                           |    |
|-----------------------------------------------------------|----|
| 1. Experimental Section .....                             | 2  |
| 2. XRD .....                                              | 3  |
| 3. SEM images .....                                       | 4  |
| 4. N <sub>2</sub> Adsorption-Desorption Testing .....     | 4  |
| 5. FT-IR .....                                            | 5  |
| 6. XPS spectra .....                                      | 6  |
| 7. <sup>13</sup> C NMR .....                              | 6  |
| 8. Fluorescence properties .....                          | 7  |
| 9. LED .....                                              | 9  |
| 10. Fractional Atomic Coordinates for the Unit Cell ..... | 11 |
| 11. Performance data of the LEDs .....                    | 15 |

# 1. Experimental Section

## 1.1 Materials

m-Tolidine (MT) and 1,3,5-benzenetricarboxaldehyde (BTA) were purchased from Sain Chemical Technology (Shanghai) Co., Ltd.

2-hydroxy-1,3,5-benzenetri-aldehyde (HBTA) was purchased from Shanghai McLean Biochemical Technology Co., Ltd.

In this experiment, all reagents, including tetrahydrofuran (THF), 1,4-dioxane, acetone, and toluene, were directly procured and used without the need for further purification.

## 1.2 Instrument

X-ray diffraction (XRD) spectra were determined using a Bruker D<sub>2</sub> PHASER X-ray diffractometer. Fourier-transform infrared spectra (FT-IR) were recorded with an IS50 Fourier Infrared Spectrometer. X-ray photoelectron spectroscopy (XPS) was gathered using a Thermo Scientific K-Alpha instrument. Nitrogen adsorption-desorption isotherms were measured with a BELSORP MAX II nitrogen adsorption-desorption specific surface area analyzer. Thermal stability was assessed via a TGA/DSC1 synchronous thermal analyzer. Material morphology was observed using a Quanta FEG400 scanning electron microscope (SEM). Fluorescence performance experiments were conducted with a Quanta Master8000 steady-state transient fluorescence spectrometer.

## 1.3 Synthesis of MT-BTA-COF

m-Tolidine (MT) (64 mg, 0.30 mmol) and 1,3,5-Benzenetricarboxaldehyde (BTA) (32 mg, 0.20 mmol) were added to a 15 mL Pyrex tube. Then, mix thoroughly using ultrasonic agitation, and add solvent, and toluene (3 mL). Next, introduce the acetic acid solution (6M, 0.3 mL). Seal the Pyrex tube after three vacuum pulls and nitrogen gas cycles, and place it in an oven at 120 °C for 72 hours. After cooling to room temperature, separate the solid powder using a Buchner funnel and wash successively with 1,4-Dioxane, tetrahydrofuran (THF), and acetone. Finally, dry in a vacuum oven at 60 °C for 12 hours to yield 84.3 mg of powder, with an approximate yield of 88%.

## 1.4 Synthesis of MT-HBTA-COF

In a 15 ml Pyrex tube, the addition of m-Tolidine (MT) (64 mg, 0.30 mmol) and 2-hydroxy-1,3,5-benzotriazole (HBTA) (36 mg, 0.20 mmol) were added. Add 3 mL of the solvent, toluene, and mix uniformly using ultrasound. Then, introduce the acetic acid solution (6M, 0.3 mL). Seal the Pyrex tube through three cycles of vacuum and nitrogen gas purging, and place it in an oven set at 120 °C for 72 hours. After cooling to room temperature, use a Buchner funnel to filter and isolate the solid powder. Wash successively with dioxane, THF, and acetone. Dry in a vacuum oven at 60 °C for 12 hours to obtain 89.35 mg of powder, yielding approximately 90%.

## 2.XRD

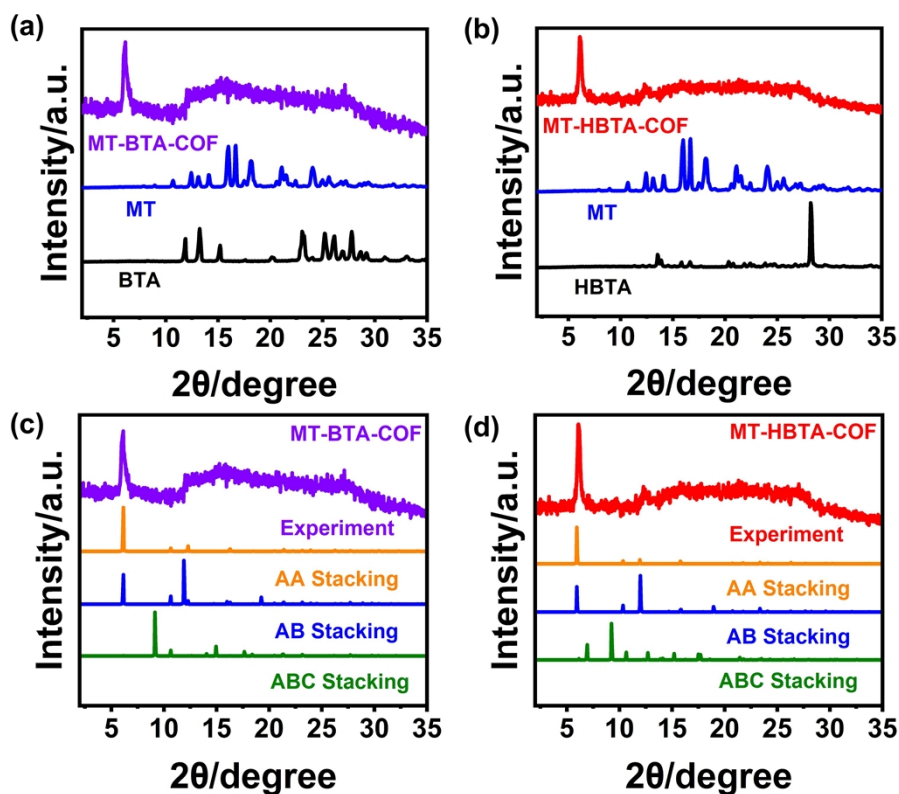

Figure S1. (a) XRD spectra of MT-BTA-COF and its precursors; (b) XRD spectra of MT-HBTA-COF and its precursors. XRD spectra of the AA stacking, AB stacking, and ABC stacking crystal structures of (c) MT-BTA-COF and (d) MT-HBTA-COF compared with experimental XRD spectra.

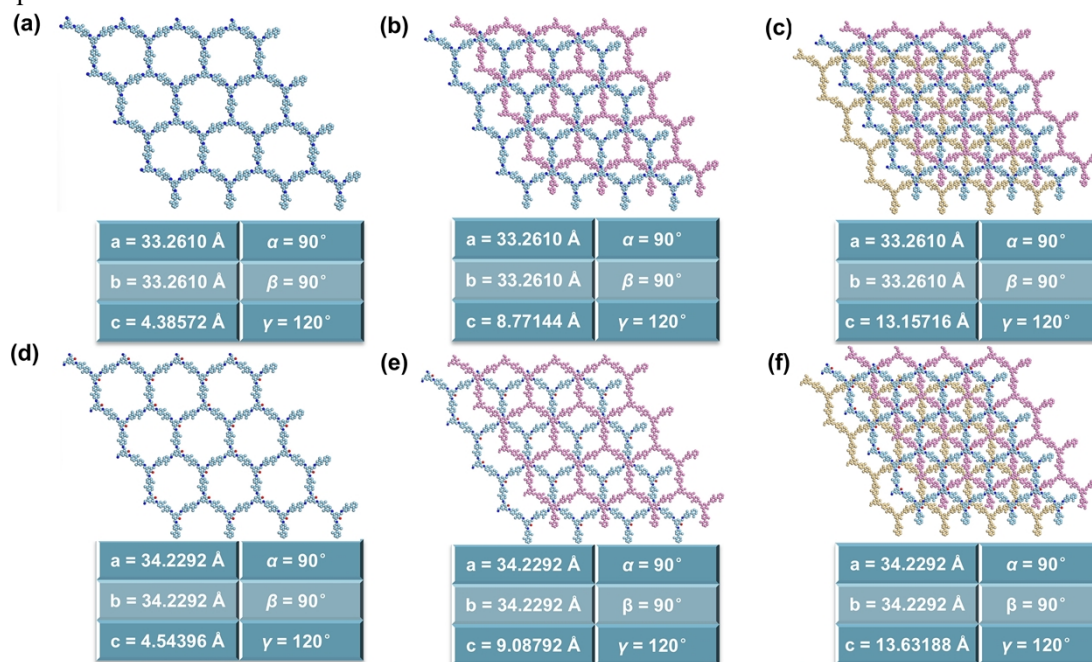

Figure S2. Schematic diagrams of crystal structures and cell parameters for simulated (a) AA stacking, (b) AB stacking, and (c) ABC stacking of MT-BTA-COF; and for simulated (d) AA stacking, (e) AB stacking, and (f) ABC stacking of MT-HBTA-COF.



### 3. SEM images

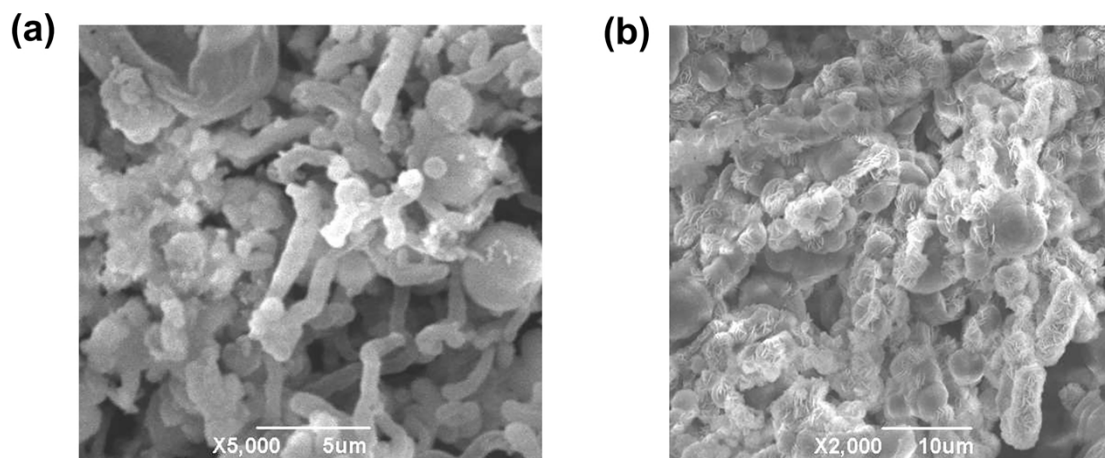

Figure S3. SEM images of (a) MT-BTA-COF and (b) MT-HBTA-COF.

### 4. N<sub>2</sub> Adsorption-Desorption Testing

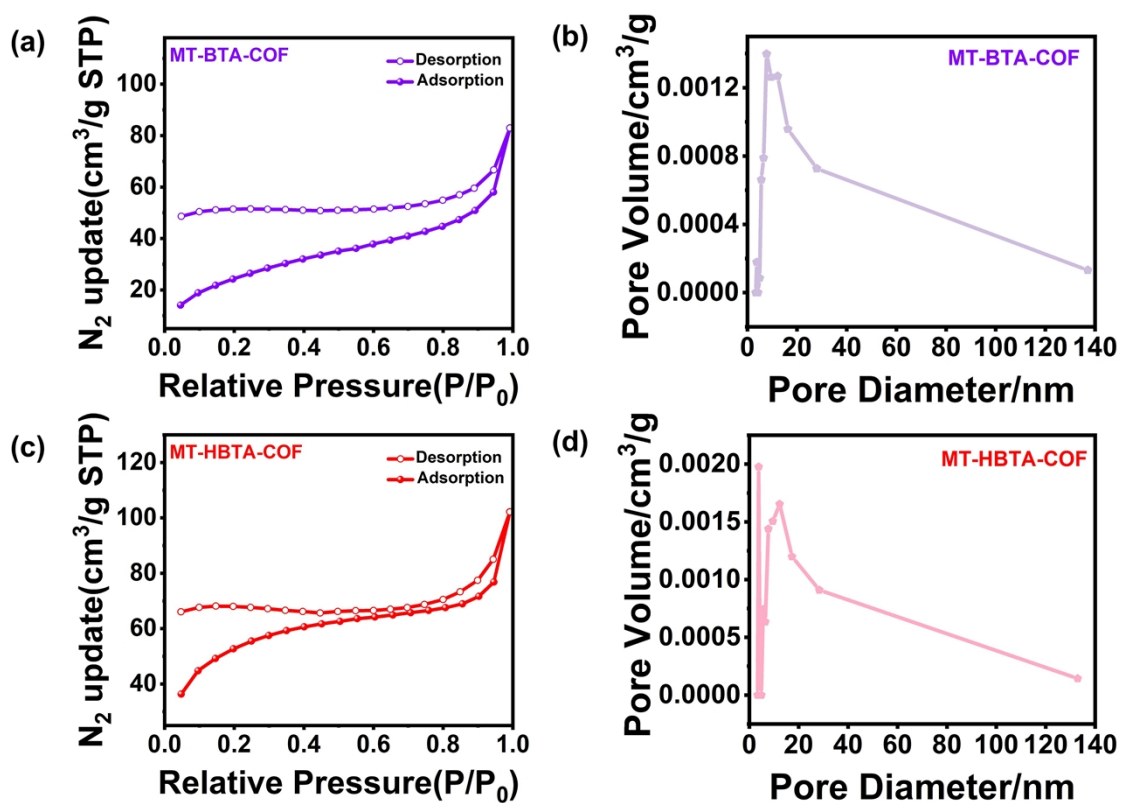

Figure S4. (a) Nitrogen adsorption-desorption isotherms of MT-BTA-COF; (b) Pore size distribution curves for MT-BTA-COF; (c) Nitrogen adsorption-desorption isotherms of MT-HBTA-COF; (d) Pore size distribution curves for MT-HBTA-COF.

## 5. FT-IR

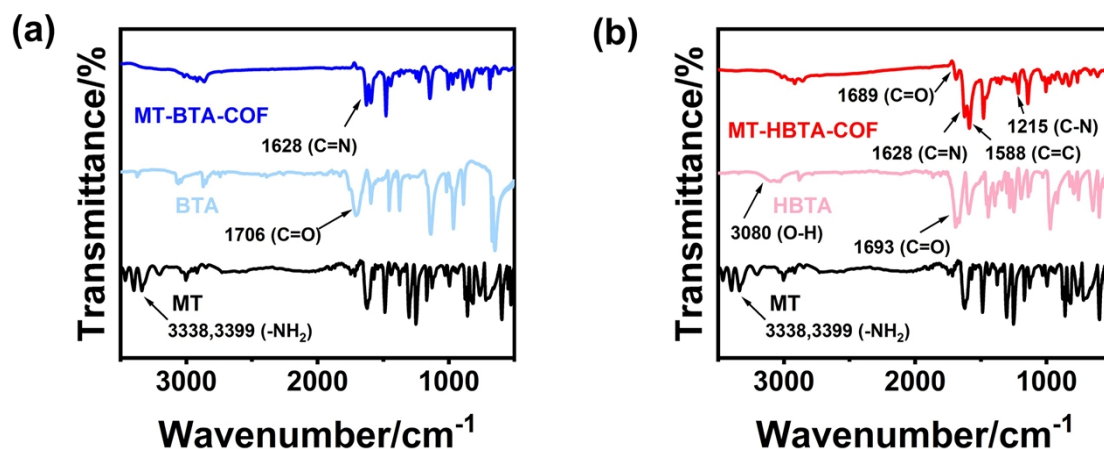

Figure S5. FT-IR spectra of (a) MT-BTA-COF and (b) MT-HBTA-COF with their respective raw materials.

FT-IR spectra confirmed the formation of imine linkages in MT-BTA-COF and MT-BTA-COF, as evidenced by the appearance of characteristic C=N stretching vibration peaks at 1628  $\text{cm}^{-1}$  and the disappearance of the stretching vibrational peak of the  $-\text{NH}_2$  group of the feedstock MT at 3200-3400  $\text{cm}^{-1}$ . At the same time, the emergence of the characteristic C-N stretching peak at 1215  $\text{cm}^{-1}$  and the formation of the C=O vibrational stretching signal at 1689  $\text{cm}^{-1}$  in MT-HBTA-COF indicate the formation of keto-enol tautomerism between the aldehyde and amine groups of the building unit.

Compared with HBTA monomer, the intensity of the -OH stretching peak at 3100-3000  $\text{cm}^{-1}$  in MT-HBTA-COF is weakened due to the formation of ketoamine structure, and the peak is red-shifted after the formation of hydrogen bonding, which may be overlapped with the C-H bonding at 3000-2900  $\text{cm}^{-1}$ .

## 6. XPS spectra

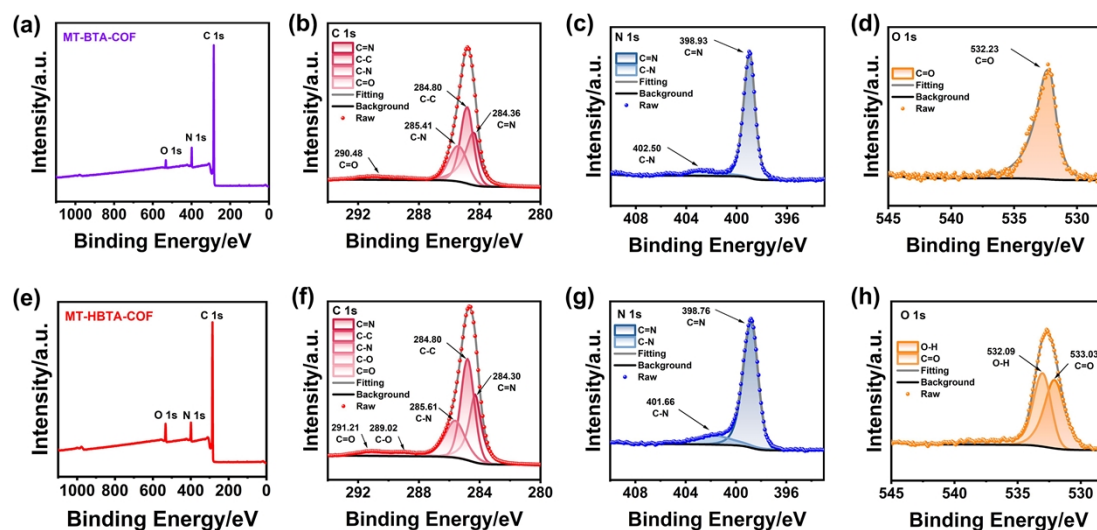

Figure S6. (a) XPS spectra of MT-BTA-COF; (b) Comparison of C 1s XPS spectra between MT-HBTA-COF and its precursors; (c) N 1s XPS spectrum of MT-BTA-COF; (d) O 1s XPS spectrum of MT-BTA-COF; (e) XPS spectra of MT-HBTA-COF; (f) C 1s XPS spectrum of MT-HBTA-COF; (g) N 1s XPS spectrum of MT-HBTA-COF; (h) O 1s XPS spectrum of MT-HBTA-COF.

## 7. $^{13}\text{C}$ NMR

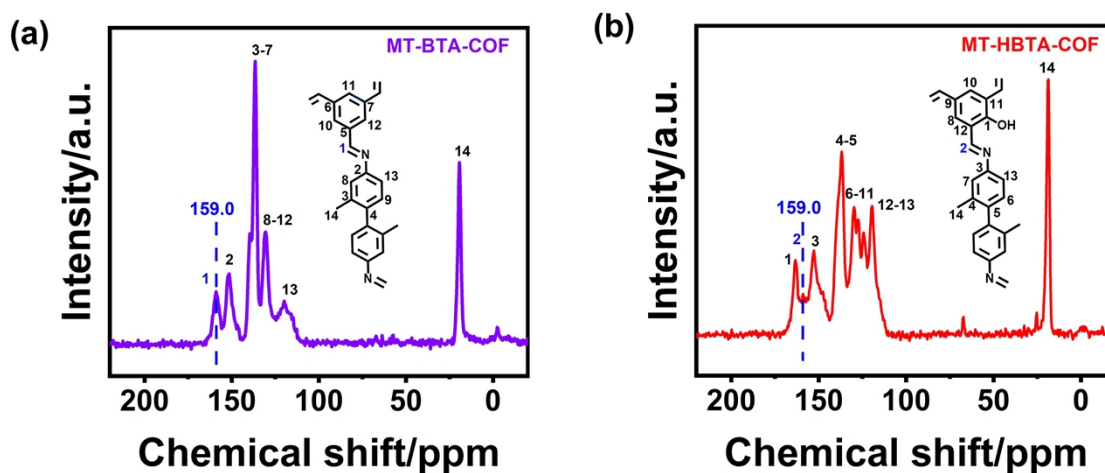

Figure S7.  $^{13}\text{C}$  NMR spectra of (a) MT-BTA-COF and (b) MT-HBTA-COF.



## 8. Fluorescence properties

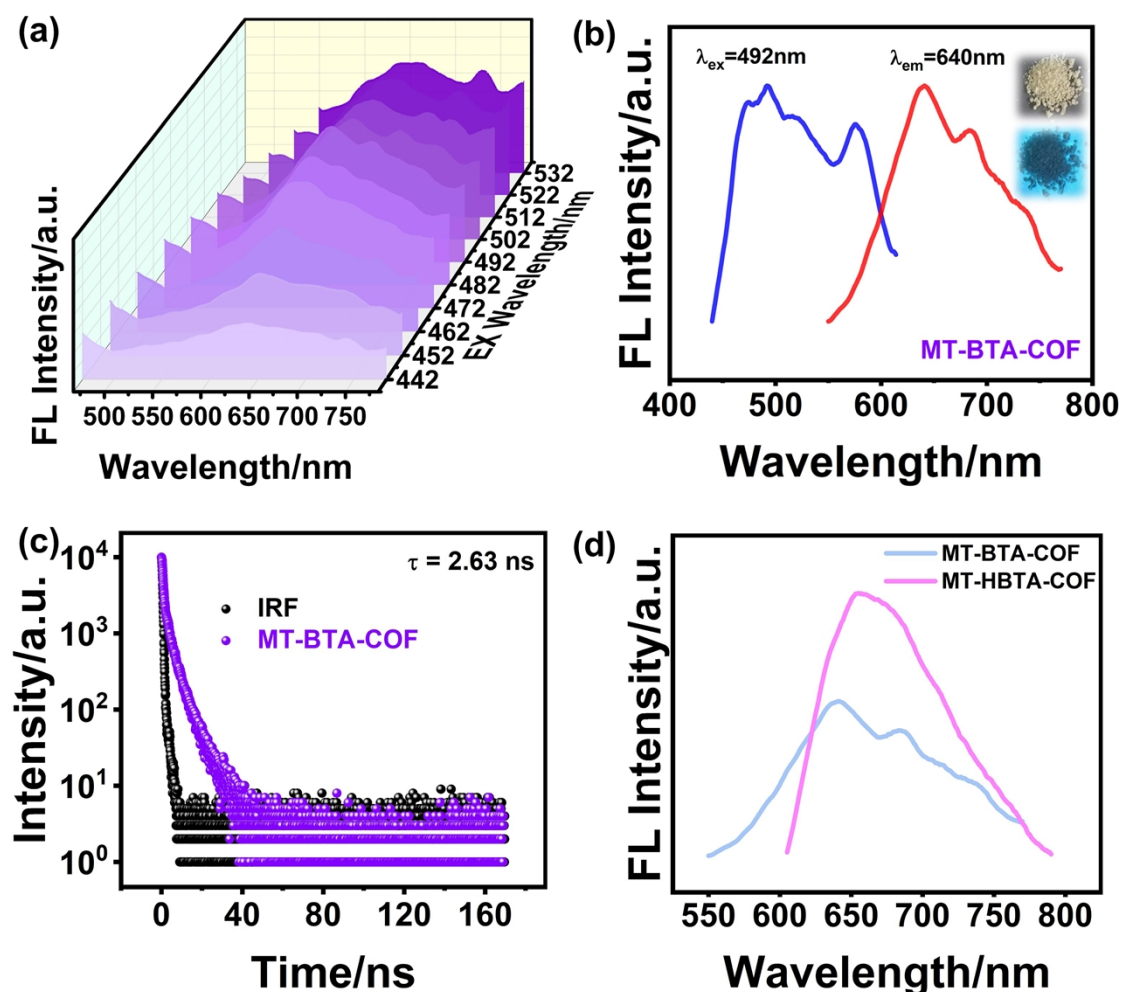

Figure S8. (a) Fluorescence spectra of solid-state MT-BTA-COF under different excitation wavelengths; (b) Fluorescence excitation-emission spectra of solid-state MT-BTA-COF; (the insert shows photographs of solid-state powder MT-BTA-COF under natural light and a 365 nm UV lamp) (c) Fluorescence decay curve with IRF of solid-state powder MT-BTA-COF; (d) Comparative fluorescence spectra of solid powders MT-BTA-COF and MT-HBTA-COF.

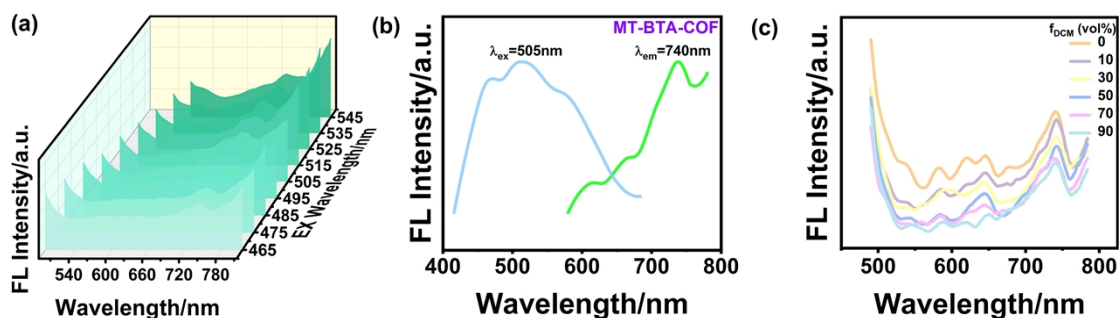

Figure S9. (a) Fluorescence spectra of MT-BTA-COF suspensions dispersed in tetrahydrofuran at different excitation wavelengths; (b) Fluorescence excitation-emission spectra of MT-BTA-COF suspensions dispersed in tetrahydrofuran; (c) fluorescence spectra of MT-BTA-COF in different ratios of DCM/THF mixed solvents.



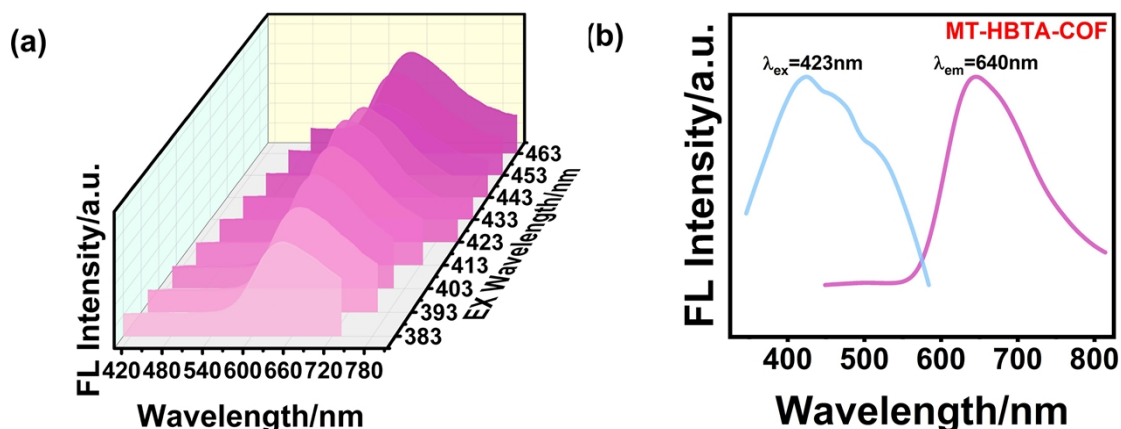

Figure S10. (a) Fluorescence spectra of MT-HBTA-COF suspensions dispersed in tetrahydrofuran at different excitation wavelengths; (b) Fluorescence excitation-emission spectra of MT-HBTA-COF suspensions dispersed in tetrahydrofuran.

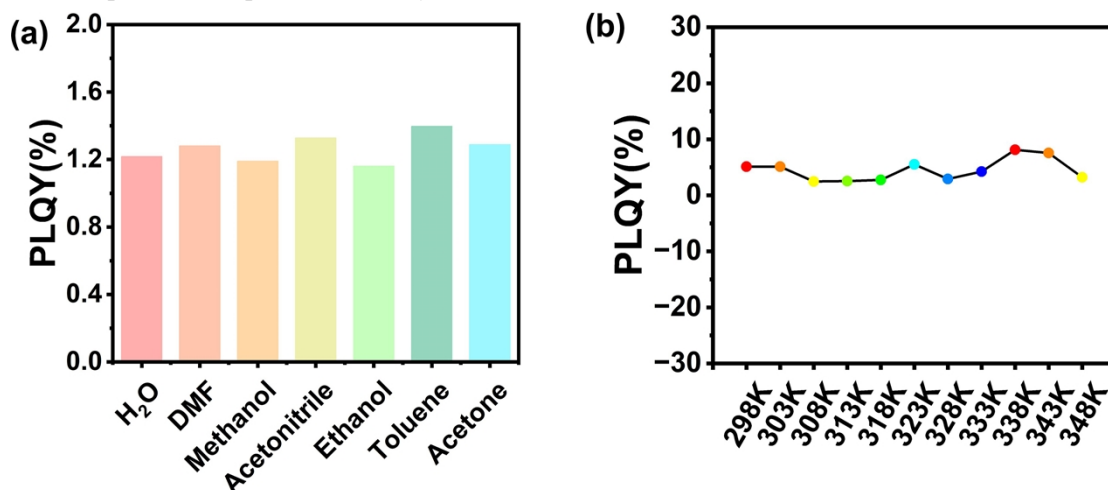

Figure S11 (a) PLQY of MT-HBTA-COF in different solvents; (b) Solid state PLQY of MT-HBTA-COF at different temperatures.

The liquid-state quantum yields of MT-HBTA-COF in various solvents, including H<sub>2</sub>O, N,N-dimethylformamide (DMF), methanol, acetonitrile, ethanol, toluene, acetone, tetrahydrofuran, and dichloromethane, were measured at 1.22%, 1.28%, 1.19%, 1.33%, 1.16%, 1.40%, and 1.29%, respectively. In solid-state conditions at temperatures of 298K, 303K, 308K, 313K, 318K, 323K, 328K, 333K, 338K, 343K, and 348K, the quantum yields were recorded as 5.13%, 5.12%, 2.46%, 2.54%, 2.73%, 5.53%, 2.91%, 4.22%, 8.12%, 7.55%, and 3.22%, respectively.

## 9. LED

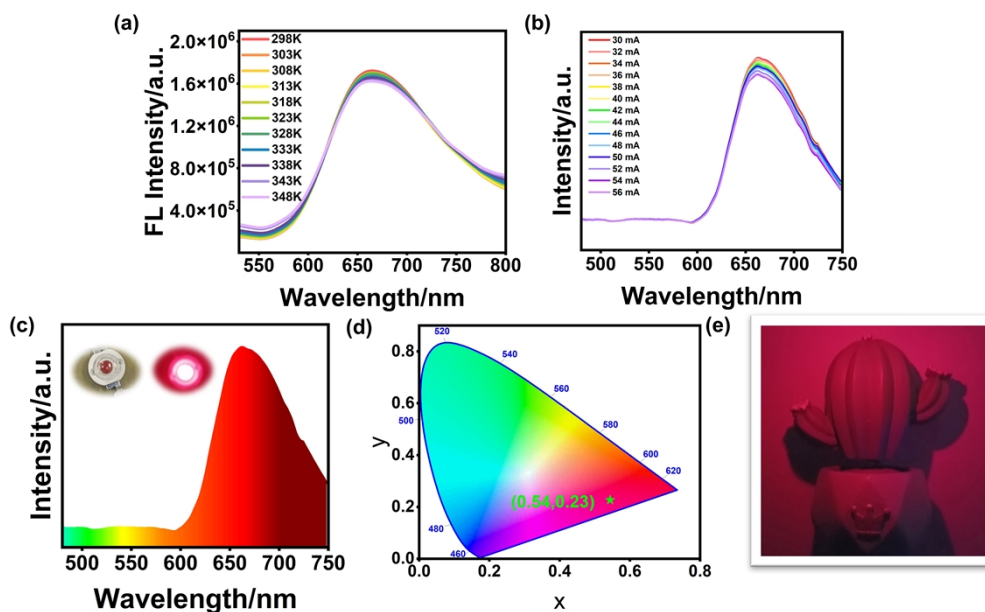

Figure S12. (a) PL emission spectra of MT-HBTA-COF at different temperatures ( $\lambda_{ex} = 469$  nm); (b) The emission spectrum of red LED made of MT-HBTA-COF as down-conversion luminescent material under different working current; (c) The emission spectrum of red LED made of MT-HBTA-COF as down-conversion luminescent material (inset is the contrast photo of LED in non-working state and working state); (d) CIE chroma coordinate of the corresponding LED; (e) Corresponding LED working image.

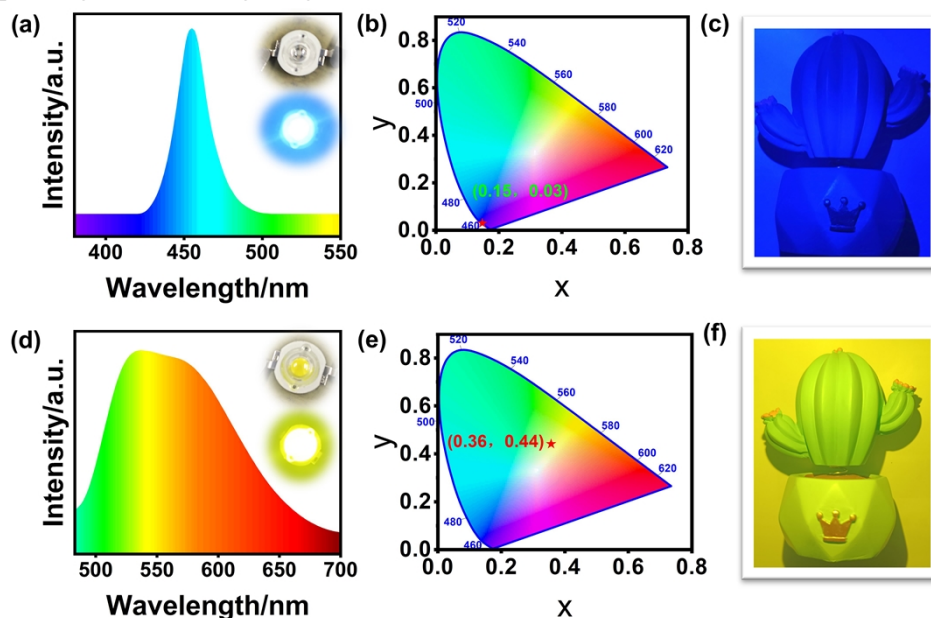

Figure S13. (a) The emission spectrum of blue chip (inset is the contrast photo of blue chip in non-working state and working state); (b) CIE chroma coordinate of the corresponding blue chip; (c) Corresponding blue chip working image. (d) The emission spectrum of yellow LED made of yellow phosphor as down-conversion luminescent material (inset is the contrast photo of LED in non-working state and working state); (e) CIE chroma coordinate of the corresponding LED; (f) Corresponding LED working image.

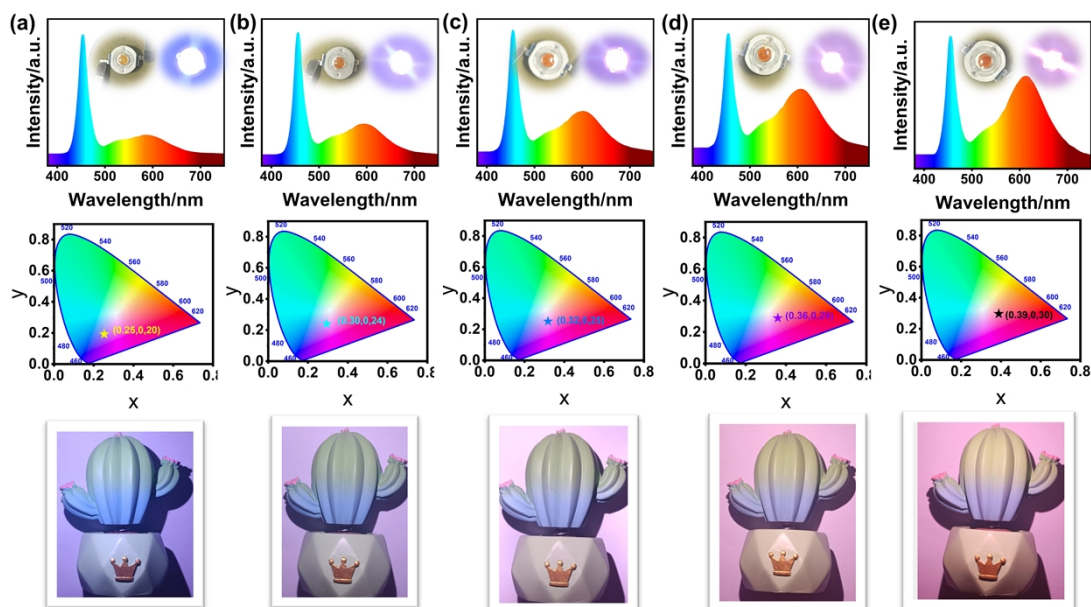

Figure S14. Characterization of white light LEDs. When the concentrations of phosphor and MT-HBTA-COF mixture in A-B adhesive are (a) 0.5, (b) 1.0, (c) 1.5, (d) 2.0, and (e) 2.5 wt%, respectively, the emission spectrum of white LED (inset is the contrast photo of LED in non-working state and working state), CIE chroma coordinate of the corresponding LED and corresponding LED working image.

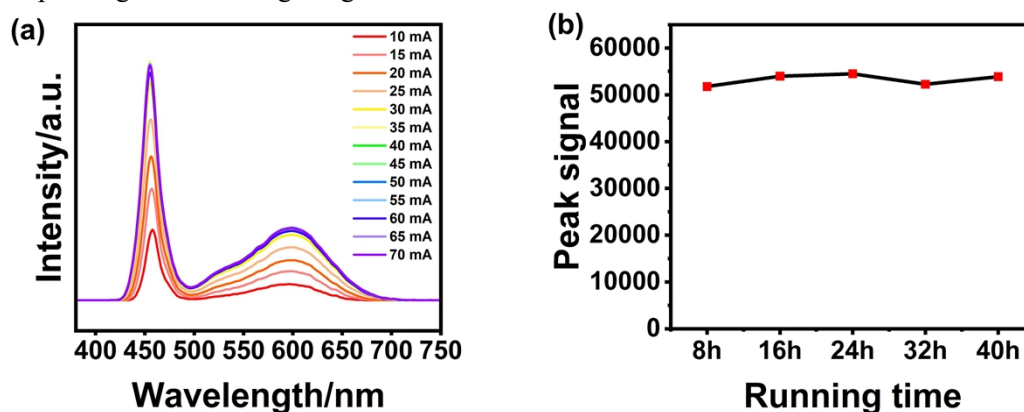

Figure S15. (a) The emission spectrum of No.3 white LED under different working current ;(b) Linear relationship between No.3 LED peak signal and running time.

## 10. Fractional Atomic Coordinates for the Unit Cell

Table S1. Atomic coordinates of the MT-BTA-COF model refined by Pawley.

| Atom | x      | y      | z      |
|------|--------|--------|--------|
| C1   | -1.148 | 10.858 | -2.271 |
| C2   | -1.058 | 10.068 | -2.069 |
| C3   | -0.356 | 9.715  | -2.362 |
| C4   | 0.286  | 10.139 | -2.834 |
| C5   | 0.183  | 10.934 | -3.107 |
| C6   | -0.532 | 11.28  | -2.815 |
| C7   | 1.065  | 9.762  | -2.806 |
| C8   | 1.657  | 10.111 | -2.043 |
| C9   | 2.328  | 9.712  | -1.701 |
| C10  | 2.425  | 8.955  | -2.104 |
| C11  | 1.878  | 8.621  | -2.97  |
| C12  | 1.194  | 9.009  | -3.31  |
| N13  | -1.822 | 11.26  | -1.805 |
| C14  | 0.808  | 11.44  | -3.693 |
| C15  | 0.616  | 8.578  | -4.153 |
| C16  | -4.321 | 12.156 | 0.426  |
| C17  | -4.408 | 11.375 | 0.107  |
| C18  | -3.807 | 10.993 | -0.556 |
| C19  | -3.123 | 11.379 | -0.911 |
| C20  | -3.037 | 12.156 | -0.581 |
| C21  | -3.629 | 12.548 | 0.094  |
| C22  | -3.501 | 13.363 | 0.436  |
| C23  | -5.114 | 10.932 | 0.441  |
| C24  | -2.495 | 10.946 | -1.567 |
| N25  | 3.042  | 8.522  | -1.51  |
| C26  | 4.293  | 7.794  | -0.086 |
| C27  | 3.644  | 7.393  | -0.576 |
| C28  | 3.558  | 6.612  | -0.284 |
| C29  | 4.102  | 6.231  | 0.513  |
| C30  | 4.744  | 6.64   | 1.016  |
| C31  | 4.85   | 7.42   | 0.703  |
| C32  | 5.561  | 7.824  | 1.148  |
| C33  | 3.033  | 7.782  | -1.35  |
| C34  | 3.994  | 5.402  | 0.766  |
| C35  | 6.42   | 8.948  | 0.913  |
| C36  | 7.047  | 8.682  | 1.673  |
| C37  | 7.749  | 9.088  | 1.685  |
| C38  | 7.85   | 9.763  | 0.933  |

---

|     |        |        |        |
|-----|--------|--------|--------|
| C39 | 7.195  | 10.065 | 0.249  |
| C40 | 6.493  | 9.649  | 0.248  |
| C41 | 8.642  | 10.121 | 0.875  |
| C42 | 8.748  | 10.883 | 1.313  |
| C43 | 9.477  | 11.242 | 1.251  |
| C44 | 10.12  | 10.851 | 0.757  |
| C45 | 10.023 | 10.088 | 0.328  |
| C46 | 9.302  | 9.714  | 0.402  |
| N47 | 5.721  | 8.509  | 0.703  |
| N48 | 10.846 | 11.259 | 0.609  |
| C49 | 7.204  | 10.81  | -0.509 |
| C50 | 9.284  | 8.891  | -0.064 |
| C51 | 4.39   | 4.223  | 1.852  |
| C52 | 3.708  | 3.796  | 1.633  |
| C53 | 3.708  | 3      | 1.773  |
| C54 | 4.386  | 2.606  | 2.144  |
| C55 | 5.065  | 3.045  | 2.446  |
| C56 | 5.051  | 3.847  | 2.309  |
| C57 | 4.391  | 1.75   | 2.022  |
| C58 | 4.947  | 1.422  | 1.174  |
| C59 | 4.935  | 0.642  | 0.871  |
| C60 | 4.363  | 0.158  | 1.42   |
| C61 | 3.809  | 0.473  | 2.276  |
| C62 | 3.809  | 1.262  | 2.579  |
| N63 | 4.441  | 5.032  | 1.59   |
| N64 | 4.297  | -0.643 | 1.079  |
| C65 | 5.822  | 2.701  | 2.894  |
| C66 | 3.171  | 1.548  | 3.469  |

---

Table S2. Atomic coordinates of the MT-HBTA-COF model refined by Pawley.

| Atom | x      | y      | z      |
|------|--------|--------|--------|
| C1   | -1.568 | 11.569 | -2.274 |
| C2   | -1.555 | 10.807 | -1.893 |
| C3   | -0.881 | 10.382 | -2.182 |
| C4   | -0.191 | 10.702 | -2.832 |
| C5   | -0.212 | 11.473 | -3.249 |
| C6   | -0.903 | 11.891 | -2.966 |
| C7   | 0.563  | 10.25  | -2.872 |
| C8   | 1.283  | 10.568 | -2.302 |
| C9   | 1.959  | 10.132 | -2.075 |
| C10  | 1.939  | 9.367  | -2.409 |
| C11  | 1.252  | 9.053  | -3.071 |
| C12  | 0.561  | 9.478  | -3.288 |
| N13  | -2.208 | 12.048 | -1.866 |
| C14  | 0.475  | 11.883 | -3.976 |
| C15  | -0.154 | 9.068  | -3.942 |
| C16  | -4.747 | 13.233 | 0.117  |
| C17  | -4.95  | 12.491 | -0.274 |
| C18  | -4.35  | 12.051 | -0.839 |
| C19  | -3.545 | 12.339 | -0.997 |
| C20  | -3.336 | 13.087 | -0.571 |
| C21  | -3.95  | 13.542 | -0.039 |
| C22  | -3.787 | 14.353 | 0.267  |
| C23  | -5.796 | 12.193 | -0.111 |
| C24  | -2.94  | 11.817 | -1.53  |
| N25  | 2.611  | 8.922  | -2.01  |
| C26  | 4.037  | 8.165  | -1.105 |
| C27  | 3.279  | 7.79   | -1.313 |
| C28  | 3.184  | 7.019  | -1.007 |
| C29  | 3.823  | 6.625  | -0.438 |
| C30  | 4.581  | 7.009  | -0.192 |
| C31  | 4.694  | 7.777  | -0.575 |
| C32  | 5.511  | 8.155  | -0.517 |
| C33  | 2.572  | 8.193  | -1.824 |
| C34  | 3.677  | 5.813  | -0.123 |
| C35  | 6.383  | 9.282  | -0.371 |
| C36  | 7.064  | 9.01   | -1.031 |
| C37  | 7.82   | 9.389  | -0.911 |
| C38  | 7.925  | 10.043 | -0.12  |
| C39  | 7.222  | 10.342 | 0.492  |
| C40  | 6.462  | 9.956  | 0.35   |
| C41  | 8.759  | 10.417 | -0.05  |

|     |        |        |        |
|-----|--------|--------|--------|
| C42 | 8.86   | 11.183 | -0.428 |
| C43 | 9.632  | 11.541 | -0.492 |
| C44 | 10.326 | 11.141 | -0.182 |
| C45 | 10.238 | 10.382 | 0.183  |
| C46 | 9.468  | 10.012 | 0.266  |
| N47 | 5.603  | 8.886  | -0.419 |
| N48 | 11.132 | 11.479 | -0.285 |
| C49 | 7.238  | 11.06  | 1.297  |
| C50 | 9.454  | 9.197  | 0.711  |
| C51 | 4.086  | 4.684  | 1.09   |
| C52 | 3.46   | 4.18   | 0.658  |
| C53 | 3.494  | 3.409  | 0.934  |
| C54 | 4.149  | 3.114  | 1.645  |
| C55 | 4.767  | 3.632  | 2.13   |
| C56 | 4.718  | 4.408  | 1.856  |
| C57 | 4.211  | 2.271  | 1.701  |
| C58 | 4.922  | 1.952  | 1.202  |
| C59 | 4.966  | 1.172  | 1.009  |
| C60 | 4.297  | 0.687  | 1.318  |
| C61 | 3.609  | 0.989  | 1.893  |
| C62 | 3.548  | 1.771  | 2.077  |
| N63 | 4.129  | 5.471  | 0.735  |
| N64 | 4.27   | -0.108 | 1.021  |
| C65 | 5.498  | 3.397  | 2.907  |
| C66 | 2.76   | 2.027  | 2.66   |
| O67 | -2.523 | 13.358 | -0.642 |
| O68 | 5.212  | 6.621  | 0.415  |

Table S3. The element content of MT-BTA-COF and MT-HBTA-COF.

| Sample      |            | C (%) | H (%) | N (%) | O (%) |
|-------------|------------|-------|-------|-------|-------|
| MT-BTA-COF  | Found      | 81.54 | 6.36  | 9.01  |       |
|             | Calculated | 82.02 | 6.02  | 11.96 |       |
| MT-HBTA-COF | Found      | 79.05 | 6.56  | 8.64  | 5.24  |
|             | Calculated | 78.45 | 5.76  | 11.44 | 4.35  |



## 11. Performance data of the LEDs

Table S4. The performance data of blue chip and LED using yellow phosphor or MT-HBTA-COF as down-conversion material.

| Test subject    | Luminous efficiency ( $\text{lm}\cdot\text{w}^{-1}$ ) | Ra   | CCT (K) | CIE (x, y)  |
|-----------------|-------------------------------------------------------|------|---------|-------------|
| Blue chip       | 21.23                                                 | 69.5 | 100000  | (0.15,0.03) |
| yellow phosphor | 18.45                                                 | 61.5 | 4785    | (0.36,0.44) |
| MT-HBTA-COF     | 0.02                                                  | 16.1 | 1001    | (0.54,0.23) |

Table S5. The performance data of LED using MT-HBTA-COF as down-conversion material under different working current.

| Working Current | Luminous Efficiency ( $\text{lm}\cdot\text{w}^{-1}$ ) | Ra   | CCT (K) | CIE (x, y)  |
|-----------------|-------------------------------------------------------|------|---------|-------------|
| 30 mA           | 0.02                                                  | 25.5 | 1001    | (0.57,0.24) |
| 32 mA           | 0.02                                                  | 20.8 | 1001    | (0.56,0.23) |
| 34 mA           | 0.02                                                  | 23.8 | 1001    | (0.56,0.23) |
| 36 mA           | 0.02                                                  | 25.2 | 1001    | (0.57,0.23) |
| 38 mA           | 0.02                                                  | 18.1 | 1001    | (0.55,0.23) |
| 40 mA           | 0.02                                                  | 24.7 | 1001    | (0.57,0.24) |
| 42 mA           | 0.02                                                  | 18.9 | 1001    | (0.57,0.23) |
| 44 mA           | 0.02                                                  | 20.8 | 1001    | (0.56,0.23) |
| 46 mA           | 0.02                                                  | 19.1 | 1001    | (0.56,0.23) |
| 48 mA           | 0.02                                                  | 19.3 | 1001    | (0.55,0.22) |
| 50 mA           | 0.02                                                  | 16.1 | 1001    | (0.54,0.23) |
| 52 mA           | 0.02                                                  | 15.2 | 1001    | (0.54,0.22) |
| 54 mA           | 0.02                                                  | 19.8 | 1001    | (0.55,0.23) |
| 56 mA           | 0.02                                                  | 16.9 | 1001    | (0.55,0.23) |

Table S6. The performance data of LED using mixtures of phosphor and MT-HBTA-COF as down-conversion material.

| No. of LEDs | Quality ratio (yellow phosphor and MT-HBTA-COF) | Concentration of the mixtures (wt.%) | Luminous efficiency ( $\text{lm}\cdot\text{w}^{-1}$ ) | Ra   | CCT (K) | CIE (x, y)  |
|-------------|-------------------------------------------------|--------------------------------------|-------------------------------------------------------|------|---------|-------------|
| 1           | 3:1                                             | 0.5                                  | 56.15                                                 | 72.7 | 100000  | (0.25,0.20) |
| 2           | 3:1                                             | 1.0                                  | 41.8                                                  | 75.5 | 11500   | (0.30,0.24) |
| 3           | 3:1                                             | 1.5                                  | 38.25                                                 | 77.1 | 7281    | (0.32,0.25) |
| 4           | 3:1                                             | 2.0                                  | 33.01                                                 | 80.8 | 3732    | (0.36,0.29) |
| 5           | 3:1                                             | 2.5                                  | 24.13                                                 | 75.1 | 2826    | (0.39,0.30) |

Table S7. The performance data of No.3 LED using mixtures of phosphor and MT-HBTA-COF as

down-conversion material under different working current.

| Working Current | Luminous efficiency ( $\text{lm}\cdot\text{w}^{-1}$ ) | Ra   | CCT (K) | CIE (x, y)  |
|-----------------|-------------------------------------------------------|------|---------|-------------|
| 10 mA           | 15.53                                                 | 60.2 | 13138   | (0.32,0.22) |
| 15 mA           | 20.49                                                 | 67.6 | 8890    | (0.31,0.24) |
| 20 mA           | 24.95                                                 | 71.3 | 7919    | (0.32,0.24) |
| 25 mA           | 30.29                                                 | 73.9 | 7472    | (0.32,0.25) |
| 30 mA           | 35.38                                                 | 75.1 | 7335    | (0.32,0.25) |
| 35 mA           | 38.44                                                 | 75.9 | 7336    | (0.32,0.25) |
| 40 mA           | 38.4                                                  | 75.7 | 7323    | (0.32,0.25) |
| 45 mA           | 38.25                                                 | 76   | 7284    | (0.32,0.25) |
| 50 mA           | 38.25                                                 | 77.1 | 7281    | (0.32,0.25) |
| 55 mA           | 38.43                                                 | 76.3 | 7185    | (0.32,0.25) |
| 60 mA           | 37.03                                                 | 76.1 | 7237    | (0.32,0.25) |
| 65 mA           | 37.26                                                 | 76.3 | 7234    | (0.32,0.25) |
| 70 mA           | 37.48                                                 | 76.1 | 7228    | (0.32,0.25) |

**Table S8. The performance data of commercial WLED.**

| Test subject      | Luminous efficiency ( $\text{lm}\cdot\text{w}^{-1}$ ) | Ra   | CCT (K) | CIE (x, y)  |
|-------------------|-------------------------------------------------------|------|---------|-------------|
| The standard WLED | 160.48                                                | 64.7 | 6312    | (0.32,0.33) |

**Table S9 Other reported examples of phosphors used for LED.**

| No. | Chemical formula                                                                             | synthetic method                                                                 | Excitation wavelength | Emission wavelength | WLED-CIE coordinates | WLED-CCT (K) | Ref. |
|-----|----------------------------------------------------------------------------------------------|----------------------------------------------------------------------------------|-----------------------|---------------------|----------------------|--------------|------|
| 1   | $\text{Gd}_{3-y}\text{Ca}_y\text{-}_{0.02}\text{GaO}_6\text{:}0.02\text{Eu}^{2+}$<br>(y=0.2) | 1500°C<br>High temperature solid-state method                                    | 460 nm                | 650 nm              | (0.38, 0.39)         | 3999         | 1    |
| 2   | $\text{BaLa}_{0.93}\text{MgNbO}_6\text{:}0.05\text{Sm}^{3+}, 0.02\text{Y}^{3+}$              | 1400°C<br>High temperature solid-state method                                    | Max: 406 nm           | Max: 599 nm         | (0.35, 0.34)         | 4938         | 2    |
| 3   | $\text{Ca}_2\text{GaNbO}_6\text{:}0.03\text{Sm}^{3+}$                                        | 1450°C<br>High temperature solid-state method                                    | Max: 406 nm           | Max: 599 nm         | No data              | 3877         | 3    |
| 4   | $\text{BaLaGaO}_4\text{:}0.30\text{Eu}^{3+}$                                                 | 1300°C<br>High temperature solid-state method                                    | Max: 394 nm           | Max: 703 nm         | (0.32, 0.34)         | 6024         | 4    |
| 5   | $\text{n}_3\%\text{-SrLaScO}_4\text{:}4\%\text{Eu}$                                          | 600°C, 1400°C, 1500°C<br>employ $(\text{NH}_4)_2\text{SO}_4$ -assisted sintering | 450 nm                | 620 nm              | (0.38, 0.37)         | 4005         | 5    |

|    |                                     |                                  |        |             |                              |         |              |
|----|-------------------------------------|----------------------------------|--------|-------------|------------------------------|---------|--------------|
| 6  | R-CDs                               | 180 °C<br>solvothormal<br>method | 385 nm | Max: 600 nm | (0.41, 0.38)                 | 3248    | 6            |
| 7  | AIE CD1                             | microwave<br>heating<br>method   | 470 nm | 550 nm      | (0.32, 0.42)<br>(0.29, 0.38) | No data | 7            |
| 8  | AIE Hz-COF <sub>TFBE-<br/>ODH</sub> | 120 °C<br>solvothormal<br>method | 397 nm | 546 nm      | (0.34, 0.35)                 | No data | 8            |
| 9  | AIE HOF-<br>76-DMSI                 | No data                          | 460 nm | 508 nm      | (0.33, 0.33)                 | 5490    | 9            |
| 10 | AIE COF                             | 110 °C<br>Hot reflux method      | 499 nm | 590 nm      | (0.42, 0.42)                 | 3348    | 10           |
| 11 | This work<br>(MT-HBTA-COF)          | 120 °C<br>solvothormal<br>method | 469 nm | 657 nm      | (0.32, 0.25)                 | 7281    | This<br>work |

1. X. Huo, Z. Wang, X. Meng, J. Zhang, Y. Wang and P. Li, *Journal of Materials Chemistry C*, 2024, **12**, 4287-4295.
2. Y. Huo, R. Chen, Y. Yang, L. Zhou, M. Chang, C. Li, W. Yang, H. Lin, L. Liu, S. Li and F. Zeng, *Ceramics International*, 2024, **50**, 48474-48484.
3. Y. Zhang, X. Guo, M. Zhang, R. Cui, J. Zhang and C. Deng, *Journal of Alloys and Compounds*, 2024, **1002**, 175459.
4. P. Ling-Hu, X. Guo, J. Hu, C. Deng and R. Cui, *Advanced Optical Materials*, 2023, **12**, 2301760.
5. Z. Yang, G. Liu, Y. Zhao, Y. Zhou, J. Qiao, M. S. Molokeev, H. C. Swart and Z. Xia, *Advanced Optical Materials*, 2022, **10**, 2102373.
6. Q. Han, W. Xu, J. Deng, X. Zhang, J. Li and Z. Peng, *ACS Applied Nano Materials*, 2023, **6**, 16373-16382.
7. Y. Zhang, P. Zhuo, H. Yin, Y. Fan, J. Zhang, X. Liu and Z. Chen, *ACS Appl Mater Interfaces*, 2019, **11**, 24395-24403.
8. H. Wan, X. Wang, Q. Nie, X. Wang, L. Wang and Y. Song, *Advanced Optical Materials*, 2025, 2402907.
9. Y.-X. Lin, J.-X. Wang, C.-C. Liang, C. Jiang, B. Li and G. Qian, *RSC Advances*, 2022, **12**, 23411-23415.
10. X. Li, H. Tang, L. Gao, Z. Chen, H. Li, Y. Wang, K. Yang, S. Lu, K. Wang, Q. Zhou and Z. Wang, *Polymer*, 2022, **241**, 124474.
